# Supplementary material for: H2O2 Induces Major Phosphorylation Changes in Critical Regulators of Signal Transduction, Gene Expression, Metabolism and Developmental Networks in Aspergillus nidulans
Source: MDPI journal article supplement (doi:10.3390/jof7080624), 2021-07-31
Supplement: s1 [file s1]

**Table S1.** H<sub>2</sub>O<sub>2</sub>-induced phosphorylation changes in putative RNA-binding proteins

| Protein      | Phosphosites without H <sub>2</sub> O <sub>2</sub>                          | Phosphosites with H <sub>2</sub> O <sub>2</sub>                            |
|--------------|-----------------------------------------------------------------------------|----------------------------------------------------------------------------|
| AN1325/Pbp1  | T367, S369, S429, S633, S634, T640                                          | S267, S429, S634                                                           |
| AN7474/JSN1  | S67, T140, S143, S207, T239, S251, S253, T401, S556, S557, S570, T572, S971 | S67, S69, S207, S251, S253, S331, S333, T401, S557, T561, S570, T572, S971 |
| AN5802/SwoK  | T84, S121                                                                   | T84, T103, S121                                                            |
| AN10257/Pbp2 | S19, S20                                                                    | S19, S20                                                                   |
| AN8293/Utp21 | S865                                                                        |                                                                            |
| AN2068/Vgl1  | S187, S832, T836, S838, S842                                                | S187, S832, T836, S838, S842                                               |
| AN4748/Nop6  | S57                                                                         | S57                                                                        |
| AN7700/Whi3  | S280, S615                                                                  | T216                                                                       |
| AN8276       | S430, S440                                                                  | S402, S423, S440, S460                                                     |
| AN3072/Nsr1  | S112                                                                        | S112, S674                                                                 |
| AN7706/Psb1  | Y74, S77                                                                    | S75, S81                                                                   |
| AN6695/NmdA  | S993, S995                                                                  |                                                                            |

**Table S2.** H<sub>2</sub>O<sub>2</sub>-induced phosphorylation changes in putative phosphatases

| Proteins                                                                                                                           | Phosphosites without H <sub>2</sub> O <sub>2</sub>                     | Phosphosites with H <sub>2</sub> O <sub>2</sub> |
|------------------------------------------------------------------------------------------------------------------------------------|------------------------------------------------------------------------|-------------------------------------------------|
| An5057/CdcA                                                                                                                        | S61, T415, S419, T430, S484, T482, S484, S602                          | S61, S63, T415, S419, T430, S484, S605          |
| AN10077/AN0425/PsrA                                                                                                                | S93, T95, S96, S207, S251, S276                                        | S151                                            |
| AN10593 (Has domain(s) with predicted phosphatase activity; similar to <i>S. cerevisiae</i> Ser2)                                  | S21, S22, S55                                                          | S21, S22                                        |
| AN10563/Pho8                                                                                                                       | S17, S18, S150                                                         | S14, S17                                        |
| AN1358 (Ortholog(s) have protein serine/threonine phosphatase activity; similar to <i>S. cerevisiae</i> Ptc2)                      | T390                                                                   | T390                                            |
| AN0914/PtcD                                                                                                                        | S427                                                                   | S31, S32, T33, T34, S427                        |
| AN4967 (Acid phosphatase, putative; Ortholog of <i>S. cerevisiae</i> Pby1)                                                         | S507, T534, T535                                                       | T534, T535                                      |
| AN4057 (Has domain(s) with predicted protein tyrosine/serine/threonine phosphatase activity; ortholog of <i>A. fumigatus</i> DspB) | S101                                                                   |                                                 |
| AN0129/PpsA                                                                                                                        | S46, S49, S50                                                          |                                                 |
| AN4713 (Ser/Thr protein phosphatase family; similar to <i>S. cerevisiae</i> YNL217W)                                               | S20                                                                    |                                                 |
| AN10946/DipA                                                                                                                       | T479, S480, S488, T490, S494, T495, T496, S505, T511, S517, T518, S526 | T479, S480, S488, T490, S536                    |

|             |                                                      |                                                |
|-------------|------------------------------------------------------|------------------------------------------------|
| AN7750/Psy2 | S716, S803, S804, T805, S806, S807, T809, S820, S822 | S803, S804, T805, S806, S807, S808, T809, S822 |
| AN4896/PtpB | S32                                                  |                                                |
| AN6892/PtcA | S6, S7, S41, S74, S86, S87, S97, S498, T500          | S86, S87, S97, S498                            |

**Table S3.** H<sub>2</sub>O<sub>2</sub>-induced phosphorylation changes in proteins involved in secondary metabolism

| Protein     | Phosphosites without H <sub>2</sub> O <sub>2</sub> | Phosphosites with H <sub>2</sub> O <sub>2</sub> |
|-------------|----------------------------------------------------|-------------------------------------------------|
| AN1034/AfoE | S2384, T2385                                       |                                                 |
| AN3612/CeM1 |                                                    | S874, T875, T877                                |
| AN2547/EasB | S1730, S1731                                       |                                                 |
| AN9407/FasA | S559, S560                                         | S162, S-559, S-560                              |
| AN9408/FasB | S5, T6, T10, T14, T2083, T466                      | S5, T6, T14, S1147                              |
| AN7873/FasI |                                                    | T533, T535, T546, S554, S554, T555              |
| AN0640/BasA | S363, S371, S376, S377, S378, T408, S410           | S363, S371, S376, T408, S410, S412              |
| AN0981/Elo1 | S470, S-533                                        | S470, S533, T474                                |
| AN4592/Sld1 | S115, S138, T140                                   |                                                 |
| AN7815/StcJ |                                                    | S88, T90                                        |
| AN3380/PkiB | S1564                                              |                                                 |

**Table S4.** H<sub>2</sub>O<sub>2</sub>-induced phosphorylation changes in proteins involved in nucleo-cytoplasmic transport

| Proteins                                                                                              | Phosphosites without H <sub>2</sub> O <sub>2</sub>    | Phosphosites with H <sub>2</sub> O <sub>2</sub>    |
|-------------------------------------------------------------------------------------------------------|-------------------------------------------------------|----------------------------------------------------|
| An5627/SonB                                                                                           | S536, S571, S572                                      | S536, S569, S571, S572                             |
| An2086/Nup159                                                                                         | T573, S795, S766, S851, S856, S997, S999, S1035, S803 | S795, S803, S851, S1035, S571, S572, T573, S782    |
| AN9109/Nup85                                                                                          | S56, S202, T232, S997, S1029, S1030, S1031, S1033     | S56, S202, S997, T1027, S1029, S1030, S1031, S1033 |
| An1190/Nup84                                                                                          | S13, S843, S844, S846, S858, S859, T861, S862         | S844, S846, S858, S859, T861                       |
| An4293/Nup133                                                                                         | T21, S37, T1271, S1274, S23, S26                      | T21, S23, S26, S37, S40                            |
| An5485/Nup2                                                                                           | T762, S764, S895, S1005, T1269, S1270                 | T1269, S1270                                       |
| An4417/Ndc1                                                                                           | S415, S439                                            | S415, S439, S463                                   |
| An6980/Nic96                                                                                          | S163, T296, S179                                      | S142, S287, T296                                   |
| An1238/Nup120                                                                                         | S1234                                                 | S1234                                              |
| An6143/Nup82                                                                                          | T824, S825, S821, T822                                | T817, S821, T822, T824, S825                       |
| AN6125/NudE                                                                                           | S532                                                  | T469                                               |
| AN0753 (Nuclear segregation protein (Bfr1), putative; similar to <i>S. cerevisiae</i> Brf1)           | S373                                                  | S373                                               |
| AN4581 (RNA binding activity and role in RNA metabolic process; similar to <i>S. cerevisiae</i> Sgd1) | S562                                                  |                                                    |
| An1157/Gle1                                                                                           | S12                                                   | S12                                                |
| An5499/Mlp1                                                                                           | T71                                                   |                                                    |

|                                                                                                                                                 |                                                                                                             |                                                    |
|-------------------------------------------------------------------------------------------------------------------------------------------------|-------------------------------------------------------------------------------------------------------------|----------------------------------------------------|
| An1188 (U2 snRNP, U2type spliceosomal complex localization; similar to <i>S. cerevisiae</i> Cus1)                                               | S15                                                                                                         |                                                    |
| An5627/SonB                                                                                                                                     | S536, S571, S572                                                                                            | S536, S569, S571, S572                             |
| An2086/Nup159                                                                                                                                   | T573, S795, S766, S851, S856, S997, S999, S1035, S803                                                       | S795, S803, S851, S1035, S571, S572, T573, S782    |
| AN9109/Nup85                                                                                                                                    | S56, S202, T232, S997, S1029, S1030, S1031, S1033                                                           | S56, S202, S997, T1027, S1029, S1030, S1031, S1033 |
| An1190/Nup84                                                                                                                                    | S13, S843, S844, S846, S858, S859, T861, S862                                                               | S844, S846, S858, S859, T861                       |
| An4293/Nup133                                                                                                                                   | T21, S37, T1271, S1274, S23, S26                                                                            | T21, S23, S26, S37, S40                            |
| An5485/Nup2                                                                                                                                     | T762, S764, S895, S1005, T1269, S1270                                                                       | T1269, S1270                                       |
| An4417/Ndc1                                                                                                                                     | S415, S439                                                                                                  | S415, S439, S463                                   |
| An6980/Nic96                                                                                                                                    | S163, T296, S179                                                                                            | S142, S287, T296                                   |
| An1238/Nup120                                                                                                                                   | S1234                                                                                                       | S1234                                              |
| An6143/Nup82                                                                                                                                    | T824, S825, S821, T822                                                                                      | T817, S821, T822, T824, S825                       |
| AN6125/NudE                                                                                                                                     | S532                                                                                                        | T469                                               |
| AN0753 (Nuclear segregation protein (Bfr1), putative; similar to <i>S. cerevisiae</i> Brf1)                                                     | S373                                                                                                        | S373                                               |
| AN4581 (RNA binding activity and role in RNA metabolic process; similar to <i>S. cerevisiae</i> Sgd1)                                           | S562                                                                                                        |                                                    |
| An1157/Gle1                                                                                                                                     | S12                                                                                                         | S12                                                |
| An5499/Mlp1                                                                                                                                     | T71                                                                                                         |                                                    |
| An1188 (U2 snRNP, U2type spliceosomal complex localization; similar to <i>S. cerevisiae</i> Cus1)                                               | S15                                                                                                         |                                                    |
| AN3910 (Establishment of mitotic sister chromatid cohesion, maintenance of rDNA; Ortholog to <i>S. cerevisiae</i> Src1)                         | T67, S68, T95, S97, S98, S100, S101, S115, T116, T175, S206, S235, T239, S249, T251, S665, S674, T669, S674 | T67, S68, T95, S97, S98, T175, S219, S665          |
| An0084 (Ran GTPase binding activity; Ortholog to <i>S. cerevisiae</i> YRB1)                                                                     | T54, S55, S57, S97                                                                                          | S97                                                |
| AN6006/KapD                                                                                                                                     | S70                                                                                                         | S70, T71                                           |
| AN2120/KapJ                                                                                                                                     | S705                                                                                                        | S705                                               |
| An0906/KapB                                                                                                                                     | S872                                                                                                        | S872                                               |
| AN8787/KapM                                                                                                                                     | T430                                                                                                        | T430                                               |
| AN6734/KapF                                                                                                                                     | T920, S922                                                                                                  | T920, S922                                         |
| An7182/Brr6                                                                                                                                     | S125                                                                                                        | S440                                               |
| AN7659 (RNA helicase activity, RNAdependent ATPase activity, inositol hexakisphosphate binding activity; Ortholog to <i>S. cerevisiae</i> DBP5) | S41                                                                                                         |                                                    |
| AN6374 (DNA helicase activity, DNA/RNA helicase activity, RNA helicase activity; similar to <i>S. cerevisiae</i> DBP9)                          | S358                                                                                                        | S358                                               |

**Table S5.** H<sub>2</sub>O<sub>2</sub>-induced phosphorylation changes in proteins involved in chromatin remodeling and transcription factors

| Protein                                                                                              | Phosphosites without H <sub>2</sub> O <sub>2</sub> | Phosphosites with H <sub>2</sub> O <sub>2</sub> |
|------------------------------------------------------------------------------------------------------|----------------------------------------------------|-------------------------------------------------|
| AN4502 (bZIP transcription factor, putative)                                                         | S54, S58                                           |                                                 |
| AN9404 (C2H2 finger domain protein, putative)                                                        | S162, T164                                         |                                                 |
| AN4418 (C2H2 finger domain protein, putative)                                                        | S241, T334                                         | S241, T334                                      |
| AN12489/AN9538 (DNA binding, nucleic acid binding, zinc ion binding activity, role in transcription) | S262                                               | S262                                            |
| AN10059 (C6 finger domain protein, putative)                                                         | S321                                               | S321                                            |
| AN4773 (C6 transcription factor, putative)                                                           | S2, S3, T4                                         |                                                 |
| AN3684 (C6 transcription factor, putative)                                                           | S166                                               |                                                 |
| AN4034/HapC                                                                                          | S146, S147                                         |                                                 |
| AN4878 (CP2 transcription factor, putative)                                                          | S8                                                 |                                                 |
| AN9492/AmdX                                                                                          | S125, T126, S146, S151, S480, S496, S498, S499     | S125, T126, S496, S497, S498, S499              |
| AN7050/FarA                                                                                          | S719, T723, S743                                   | T723                                            |
| AN0937 (DNA binding, DNA binding transcription factor activity)                                      |                                                    | S647                                            |
| AN10548/AN4350 (Putative Zn(II)2Cys6 transcription factor)                                           | Y211, T212, T213, S220                             |                                                 |
| AN3435/LreA                                                                                          | S363, T366                                         | S363, T366                                      |
| AN1927 (Putative Zn(II)2Cys6 transcription factor)                                                   |                                                    | S174                                            |
| AN2136 (Putative Zn(II)2Cys6 transcription factor)                                                   | T580, S581, S582, Y587                             | S187, S284, S292, S579, T580, S581, S582        |
| AN2852 (Putative Zn(II)2Cys6 transcription factor)                                                   | T744, S761                                         |                                                 |
| AN4489 (Putative Zn(II)2Cys6 transcription factor)                                                   | S9                                                 | S9, S12                                         |
| AN6091 (Putative Zn(II)2Cys6 transcription factor)                                                   | S161                                               | S161                                            |
| AN7508 (Putative Zn(II)2Cys6 transcription factor)                                                   | S283, S375, S377, S748                             | S283                                            |
| AN8885 (Putative Zn(II)2Cys6 transcription factor)                                                   | S137                                               |                                                 |
| AN7170/SrbB                                                                                          | S131, S142                                         | S131, S142                                      |
| AN2854 (Putative forkhead transcription factor)                                                      | S20, S310                                          | S20, S143, S310                                 |
| AN4985 (Putative forkhead transcription factor)                                                      | S 651                                              |                                                 |

|                                                     |                                              |                                                |
|-----------------------------------------------------|----------------------------------------------|------------------------------------------------|
| AN8858/McnB                                         | S54, T55, S56, S634                          |                                                |
| AN1729/PrnA                                         | S72                                          | S72                                            |
| AN2597 (Putative Zn(II)2Cys6 transcription factor)  | S61, S68                                     | S61, S68, T70                                  |
| AN3050 (Putative Zn(II)2Cys6 transcription facto)   | S206                                         | S206                                           |
| AN3683 (Putative Zn(II)2Cys6 transcription factor)  | T673, S674, S675, S677, S679, T680           |                                                |
| AN4558 (Putative Zn(II)2Cys6 transcription factor)  | S158, S167, T169, S186                       | S156, S158, S167                               |
| AN5849 (Putative Zn(II)2Cys6 transcription factor)  | S554, T557, T637, S653, S946                 | S554, T557, S946                               |
| AN5924 (Putative Zn(II)2Cys6 transcription factor)  | S206                                         | S206, S211                                     |
| AN6889 (Putative Zn(II)2Cys6 transcription factor)  | S83, S301                                    | S83, T294, S295, S301                          |
| AN7332 (Putative Zn(II)2Cys6 transcription factor)  | S51, S53, S55, S56                           |                                                |
| AN8161 (Putative Zn(II)2Cys6 transcription factor)  | S85, S86, S92                                | S86                                            |
| AN8694 (DNA binding transcription factor activity)  | S322                                         | S322, S328                                     |
| AN9147 (Putative Zn(II)2Cys6 transcription factor)  | S231                                         | S231                                           |
| AN1777/Cti6 (Rpd3L)                                 | T48, S52, S180, T182, T448, S458, S463       | S180, S217, T448, T450, S453, S458, T460, S461 |
| AN2857/Pho23 (Rpd3L)                                | S349, S467                                   | S349                                           |
| AN3668 (PHD finger domain protein, putative)        | S509, S510, S707, S708, S711, S755, S756     | S509, S510, S755, S756                         |
| AN7300 (PHD finger domain protein, putative)        | S260, T439, S441, T443                       |                                                |
| AN0986 (PHD finger domain protein)                  | S73, S87, S358, S424                         | S358, S424                                     |
| AN6675 (PHD finger domain protein, putative)        | S11                                          | S6, S11                                        |
| AN8939 (PHD finger protein)                         | S199                                         |                                                |
| AN8676/McmA                                         | S39                                          | S13                                            |
| AN2911/AtfA                                         | T159                                         | S132, S136                                     |
| AN7513/NapA                                         | S318                                         | T316, S318                                     |
| AN0134/RmtC                                         | T529                                         |                                                |
| AN4493/ RpdA                                        | S447, S449, S496                             | S447, S449, S496                               |
| AN1944 (Zinc knuckle domain protein)                | S6                                           |                                                |
| AN4894 (Transcriptional activator spt7)             |                                              | S451                                           |
| AN4694 (Transcriptional regulator (Cti6), putative) | S471                                         | T468, S471                                     |
| AN9538/AN12489 (DNA binding, nucleic acid binding)  | S262                                         | S262                                           |
| AN8211 (PHD transcription factor (Rum1), putative)  | S25, T298, S1297, S1301, S1520, T1623, S1640 | T298, S402, S1297, S1301, S1520, T1623, S1640  |

|                                                                                       |                                                                                                             |                                                               |
|---------------------------------------------------------------------------------------|-------------------------------------------------------------------------------------------------------------|---------------------------------------------------------------|
| AN0162 (Putative APSES transcription factor)                                          | S170, S172, S173                                                                                            | S170, S172, S173                                              |
| AN0153 (Putative Myb like transcription factor)                                       | S54                                                                                                         | S52, S54                                                      |
| AN1402 (Putative Zn(II)2Cys6 transcription factor)                                    | S46, S92, T93, S94, S96, S109, S111, S138, T143, S150, T154, S176, S177, T178, T274, S345, T372, S373, S390 | S46, S92, T93, S94, S109, S126, S138, S345, S373, T388, S390, |
| AN2771 (Transcription factor Rba50, putative)                                         |                                                                                                             | S143                                                          |
| AN6696 (Chromatin binding activity, role in cellular response to DNA damage stimulus) | S83, S240, S243, S276                                                                                       | S240, S243, S276,                                             |
| AN0766/PacX                                                                           | S17, S19, S256                                                                                              | S19, S256                                                     |
| AN4585 (CCR4 NOT transcription complex, subunit 3)                                    | T363, S365, T392, S396, S255, S280, S390, T392                                                              | S255, S280, T392, S396                                        |
| AN6195/CreA                                                                           | S193                                                                                                        | S193                                                          |
| AN1944 (Zinc knuckle domain protein)                                                  | S6                                                                                                          |                                                               |
| AN8035 (Hsf1)                                                                         | T91, S302, S451, S485                                                                                       | T449, S451, S485                                              |
| AN2278 (Catalytic subunit of the SWI/SNF chromatin remodeling complex)                | S500, S502                                                                                                  |                                                               |
| AN6705/RSC8                                                                           | S247, T249                                                                                                  |                                                               |
| AN1440/AN10191 (AAA family ATPase, putative)                                          | S160, S1496                                                                                                 | S160, S1496                                                   |
| AN0689/FacB                                                                           | S655, T653                                                                                                  | T653                                                          |
| AN8687 (Role in regulation of transcription)                                          |                                                                                                             | S165                                                          |
| AN6505/RcoA                                                                           | T190                                                                                                        | T190                                                          |
| AN3120/PrfT                                                                           | S20, T154                                                                                                   | S5                                                            |
| AN6715 (Putative APSES transcription factor similar to MbpA)                          | S230                                                                                                        |                                                               |
| AN5048 (Homeobox transcription factor, putative)                                      |                                                                                                             | S331                                                          |
| AN0091/Dot1                                                                           |                                                                                                             | S56                                                           |
| AN8825/Set2                                                                           | S46, T552                                                                                                   |                                                               |
| AN5795/Set1                                                                           | S703                                                                                                        | S703                                                          |
| AN6147/Set9                                                                           | S461, T467                                                                                                  |                                                               |
| AN1060/KdmA                                                                           | T246, S249                                                                                                  |                                                               |
| AN10956/Esa1                                                                          | S113, S117, T119, S171                                                                                      | S113, S117, T119, S171                                        |
| AN5640/Nmy1                                                                           | T285, S287, S313                                                                                            | T285, S287, S304, S313                                        |
| AN3071/Nmy2                                                                           | T302                                                                                                        |                                                               |
| AN2487 (Chromatin remodeling complex subunit (Arp5), putative)                        | T567, S571, S722                                                                                            | T567, S571, S722                                              |
| AN1286/Hir1                                                                           | S1059                                                                                                       | S1059                                                         |
| AN1453/Dep1                                                                           | S102, S104                                                                                                  |                                                               |
| AN1375/Rtx2                                                                           | S26                                                                                                         | S26                                                           |
| AN3178/Sds3                                                                           | S29, S31, T34, S263                                                                                         | S29, T34, S363                                                |
| AN1546/Sin3                                                                           | T356, S629, T631                                                                                            | T631                                                          |
| AN2421/FlbC                                                                           | S150, T186                                                                                                  | S150, T186                                                    |
| AN5836/StuA                                                                           |                                                                                                             | S421                                                          |

|             |                                               |                                                      |
|-------------|-----------------------------------------------|------------------------------------------------------|
| AN1937/WetA | T142                                          |                                                      |
| AN6578/OsaA | S131, S125, T382, S386, T392, S421            | S131, S133, S361, T385, S386, S391, S399, S413, S421 |
| AN0807/LaeA | S70                                           | S70                                                  |
| AN5893/FlbA | S98, S409, S410, S412, S414, S416, S418, S702 | S98, S409, S410, S413, S414, S416, S418, S420, S702  |

**Table S6.** H<sub>2</sub>O<sub>2</sub>-induced phosphorylation changes in proteins involved in nitrogen metabolism

| Protein                                                                                                                                                     | Phosphosites without H <sub>2</sub> O <sub>2</sub> | Phosphosites with H <sub>2</sub> O <sub>2</sub> |
|-------------------------------------------------------------------------------------------------------------------------------------------------------------|----------------------------------------------------|-------------------------------------------------|
| An8667/AreA                                                                                                                                                 | S 234, S 619, T 620, S 744, S 766, S797            | S440, S441, S619, S744, T749, S766              |
| AN2944/TamA                                                                                                                                                 | S160                                               | S160, S175, S229                                |
| AN44867/LeuB                                                                                                                                                |                                                    | S 150                                           |
| AN6221/AreB                                                                                                                                                 | S183                                               |                                                 |
| NmrA                                                                                                                                                        | S283, S89                                          |                                                 |
| AN0098/NirA                                                                                                                                                 |                                                    | S725, S727                                      |
| AN1927                                                                                                                                                      |                                                    | S174                                            |
| AN4489                                                                                                                                                      | S9                                                 | S12                                             |
| AN0891/UaY                                                                                                                                                  |                                                    | S922                                            |
| An1006/NiaD                                                                                                                                                 | S2, T3, T4, T10, S12, T16, S605, S606,             | S605, S606                                      |
| AN1007/NiiA                                                                                                                                                 | S404, S407                                         | S404, S407, T643, T1095, S1097                  |
| AN7367 (Activity and role in nitrogen compound metabolic process (nitrilase); similar to <i>S. cerevisiae</i> NIT1)                                         | S343                                               | S2, S11, T13                                    |
| AN1008/CrnA                                                                                                                                                 | T277, T279                                         |                                                 |
| AN0439 (Nitrogen permease regulator; role in cellular response to nitrogen starvation, negative regulation of TORC1; similar to <i>S. cerevisiae</i> npr2 ) | S522                                               |                                                 |
| An0399/NrtB                                                                                                                                                 | S252, S255, S259, S260                             | T247, S255                                      |
| AN5134/GltA                                                                                                                                                 | S682, S1925                                        |                                                 |
| An4376/GdhA                                                                                                                                                 | S397                                               | S397                                            |
| AN7451/GdhB                                                                                                                                                 | S581, S582                                         |                                                 |
| AN10709/GfaA                                                                                                                                                | T90, T93, S95, T238, T312, S313                    | T238, T312, S313                                |
| AN4159/GlnA                                                                                                                                                 |                                                    | S316                                            |
| AN10019/OcA2                                                                                                                                                | S109, T112, S205, S206, T211, S224, S225, S649     | S205, S206, S210, T211, S224, S225, S323        |

**Table S7.** H<sub>2</sub>O<sub>2</sub>-induced phosphorylation changes in proteins involved in proteasome-mediated proteolysis

| Protein     | Phosphosites without H <sub>2</sub> O <sub>2</sub>                        | Phosphosites with H <sub>2</sub> O <sub>2</sub>       |
|-------------|---------------------------------------------------------------------------|-------------------------------------------------------|
| AN1966/HulE | S169, S313, T1201, S1205, T1210, S1629, S1630, S1634, S3064, T3067, T3708 | S169, Y1113, T1121, T1201, S1203, S1205, T1210, T3708 |

|                                                                                               |                                                                                                                                                            |                                                                    |
|-----------------------------------------------------------------------------------------------|------------------------------------------------------------------------------------------------------------------------------------------------------------|--------------------------------------------------------------------|
| AN2267 (Ubiquitin C terminal hydrolase family protein)                                        | S337, S483, <a href="#">S576</a> , <a href="#">S618</a> , <a href="#">S621</a> , <a href="#">T622</a> , <a href="#">S623</a> , <a href="#">S641</a> , S677 | S337, S483, S484, S576, S677                                       |
| AN2072 (Putative ubiquitin specific protease; ortholog of <i>S. cerevisiae</i> Doa4p)         | S160, S161, <a href="#">S359</a> , T368                                                                                                                    | S160, S161, T368                                                   |
| AN4170/CreD                                                                                   | <a href="#">T383</a> , S508, <a href="#">Y509</a> , S510                                                                                                   | <a href="#">S388</a> , <a href="#">T392</a> , S508, S510           |
| AN2442 (Ubiquitin protein ligase (Asi3), putative)                                            | <a href="#">S699</a> , <a href="#">T761</a> , S776, T777, S788                                                                                             | S776, S777, S788                                                   |
| AN6359/SconB (part of the ubiquitin ligase complex/ involved in sulfur metabolite repression) | S271, S278, <a href="#">S303</a> ,                                                                                                                         | <a href="#">S115</a> , S271, S278, <a href="#">S281</a>            |
| AN1995 (Ubiquitin ligase)                                                                     | T595, <a href="#">S596</a> , S601                                                                                                                          | T595, S601                                                         |
| AN3923 (Ubiquitin protein ligase activity)                                                    | S1294                                                                                                                                                      | S1294                                                              |
| AN7422 (Ubiquitin carboxyl-terminal hydrolase)                                                | S350                                                                                                                                                       | S350                                                               |
| AN6164 (Thiol-dependent ubiquitinyl hydrolase activity)                                       | <a href="#">S93</a> , <a href="#">T95</a> , <a href="#">S1038</a> , <a href="#">S1901</a> , <a href="#">T1902</a> , <a href="#">S1903</a>                  |                                                                    |
| AN3597/AcrB                                                                                   |                                                                                                                                                            | <a href="#">S910</a> , <a href="#">S911</a>                        |
| AN5186 (Thiol-dependent ubiquitin specific protease activity)                                 | <a href="#">S205</a> , <a href="#">S786</a>                                                                                                                |                                                                    |
| AN3711 (Molecular adaptor activity, thiol-dependent ubiquitin specific protease activity)     | <a href="#">S140</a> , <a href="#">S141</a>                                                                                                                |                                                                    |
| AN6913 (Thiol-dependent ubiquitin specific protease activity)                                 | <a href="#">S126</a>                                                                                                                                       |                                                                    |
| AN1339/HulA                                                                                   | <a href="#">S464</a>                                                                                                                                       |                                                                    |
| AN3587 (Ubiquitin processing protease involved in carbon catabolite repression)               | <a href="#">S258</a> , <a href="#">S260</a> , <a href="#">S261</a> , <a href="#">T269</a>                                                                  |                                                                    |
| AN0883 (Ubiquitin conjugating enzyme)                                                         | <a href="#">S142</a>                                                                                                                                       |                                                                    |
| AN1700 (Putative 26S proteasome regulatory subunit)                                           | T182, S184, S940, T946, <a href="#">T948</a> , T949                                                                                                        | T182, S184, S940, T946, T949                                       |
| AN5607 (Peptidase activator activity, proteasome binding activity)                            | <a href="#">T25</a> , <a href="#">S26</a> , <a href="#">T20</a> , S1858, S1861, S1862, S1865, <a href="#">T1870</a>                                        | S1858, S1861, S1862, S1865                                         |
| AN5872 (Proteasomal ubiquitin-dependent protein catabolic process)                            | <a href="#">S16</a>                                                                                                                                        |                                                                    |
| AN6547 (Proteasomal ubiquitin-dependent protein catabolic process)                            |                                                                                                                                                            | <a href="#">S110</a>                                               |
| AN8192/UlpB                                                                                   | T500, S501                                                                                                                                                 | <a href="#">S167</a> , <a href="#">S496</a> , T500, S501           |
| AN10456/DenA                                                                                  |                                                                                                                                                            | <a href="#">S241</a> , <a href="#">S243</a> , <a href="#">S253</a> |
| AN2689/UlpA                                                                                   | <a href="#">S595</a>                                                                                                                                       |                                                                    |



|                                                                                                      |  |          |
|------------------------------------------------------------------------------------------------------|--|----------|
| AN3449 (Thiol-dependent ubiquitin specific protease activity; ortholog of <i>S. cerevisiae</i> Otu1) |  | S97, S98 |
|------------------------------------------------------------------------------------------------------|--|----------|

**Table S8.** H<sub>2</sub>O<sub>2</sub>-induced phosphorylation changes in proteins involved in gluconeogenesis and the pentose phosphate pathway

| Protein                                                                                                             | Phosphosites without H <sub>2</sub> O <sub>2</sub>   | Phosphosites with H <sub>2</sub> O <sub>2</sub> |
|---------------------------------------------------------------------------------------------------------------------|------------------------------------------------------|-------------------------------------------------|
| AN4462/PycA                                                                                                         | S40, S1111                                           | S40                                             |
| AN5604/AcuG                                                                                                         | S323                                                 | S323                                            |
| AN2875/FbaA                                                                                                         |                                                      | S8                                              |
| AN2688 (Glucose 6 phosphatase activity, sphingosine 1 phosphatase, Ortholog of <i>S. cerevisiae</i> Sgp1)           | S387, S410, S418, S443                               | S387, S410, T430, S443                          |
| AN2867/PgmB                                                                                                         | T106, T112, T114                                     | S114                                            |
| AN0689/FacB                                                                                                         | T653, S655                                           | T653                                            |
| AN6499/MdhC                                                                                                         |                                                      | S326                                            |
| AN1059/facC                                                                                                         | S62, S707, S708                                      | S707, S708                                      |
| AN0688 (Putative transketolase, ortholog of <i>S. cerevisiae</i> Tk1)                                               | S255, S335, S674                                     | S335, S362, S674                                |
| AN9180 (Putative transketolase, ortholog of <i>S. cerevisiae</i> Tk2)                                               |                                                      | S290                                            |
| An0240/PppA                                                                                                         | S38, S51, S206, S209, S 227, S268, S278              | S206, S227, S278, Y279                          |
| AN6037/SwoM                                                                                                         | S3                                                   |                                                 |
| AN3954 (Putative phosphogluconate dehydrogenase)                                                                    | S131, S166, T249                                     | S131, T249                                      |
| AN12221/AN4772 (predicted catalytic activity, deoxyribose phosphate aldolase activity, lyase activity)              | S263                                                 | S262, S263                                      |
| AN6711/Prs1 (Putative ribose phosphate pyrophosphokinase)                                                           | T260, S268, S255                                     | T260, S262, S268                                |
| AN3223/PfkA (Putative 6 phosphofructokinase with a predicted role in gluconeogenesis and glycolysis)                | S331, T786, S789, S790                               | S784, T786, S789, S790                          |
| AN0688 (Putative transketolase, ortholog of <i>S. cerevisiae</i> Tk1)                                               | S255, S335, S674                                     | S335, S362, S674                                |
| AN3169/Prs3 (Putative ribose phosphate pyrophosphokinase)                                                           | S121, S128, S129, S131, S132, S164, S165, S167, S178 | S164, S165, S167, T182, S185                    |
| AN1015/Putative phosphorylase with a predicted role in glycogen degradation, ortholog of <i>S. cerevisiae</i> Gph1) | S11, T37                                             | S11, S17, T37                                   |
| AN3829/Uga2                                                                                                         |                                                      | T261, T262                                      |
| AN1923/Alt1                                                                                                         |                                                      | S72                                             |

|                                     |                 |      |
|-------------------------------------|-----------------|------|
|                                     |                 |      |
| AN8990 (GABA transporter, putative) | S23, S531, S532 | S532 |

**Table S9.** H<sub>2</sub>O<sub>2</sub>-induced phosphorylation changes in proteins directly involved in ROS metabolism

| Protein                                                                    | Phosphosites without H <sub>2</sub> O <sub>2</sub> | Phosphosites with H <sub>2</sub> O <sub>2</sub> |
|----------------------------------------------------------------------------|----------------------------------------------------|-------------------------------------------------|
| An3973/TpxB                                                                |                                                    | S177                                            |
| AN10223/TpxA                                                               | S136                                               | S136                                            |
| AN0170/TrxA                                                                | S83                                                | S83                                             |
| PrxA/An8692                                                                | S30                                                |                                                 |
| An2981/GsdA                                                                |                                                    | S418                                            |
| AN9339/CatB                                                                |                                                    | S719                                            |
| AN5918/CatC                                                                | S15                                                | S15                                             |
| AN10660/ndiA                                                               |                                                    | S261                                            |
| AN6046/NoxR                                                                | S308, T309, T310                                   | S308, T309                                      |
| AN3004/OXR1                                                                | S315, T317, T318, T319                             |                                                 |
| AN1100 (Hypothetical 5-oxoprolinase; similar to <i>S. cerevisiae</i> Oxp1) |                                                    | T318, S322, T324                                |
